# Supplementary material
Source: PubMed Central journal article supplement (PMC6697901)
Supplement: NIHMS1510210-supplement-Supplemental_Figures.pdf [file NIHMS1510210-supplement-Supplemental_Figures.pdf]

**Figure E1: ARDS develops by ICU day 1 in 80% of subjects who develop sepsis-associated ARDS**

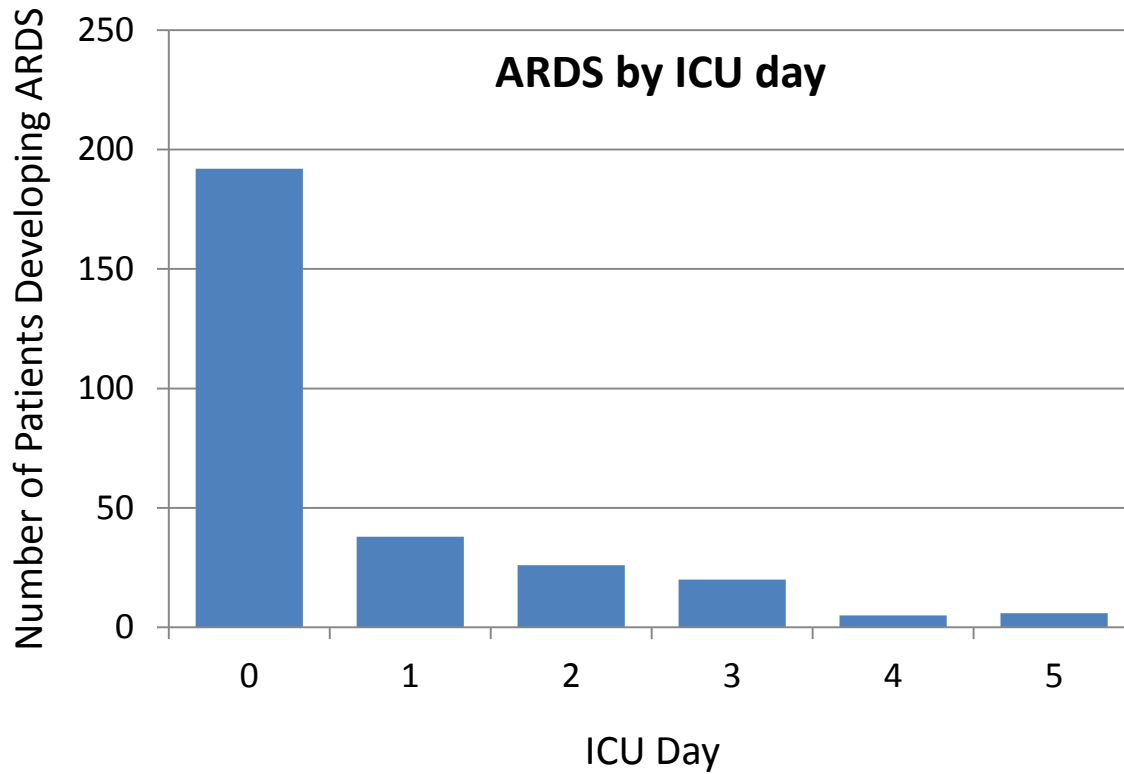

**Figure E2: Genetic ancestry determination by principal components analysis (a) and linkage disequilibrium structure in *ANGPT2* (b)**

**a) Genetic ancestry**

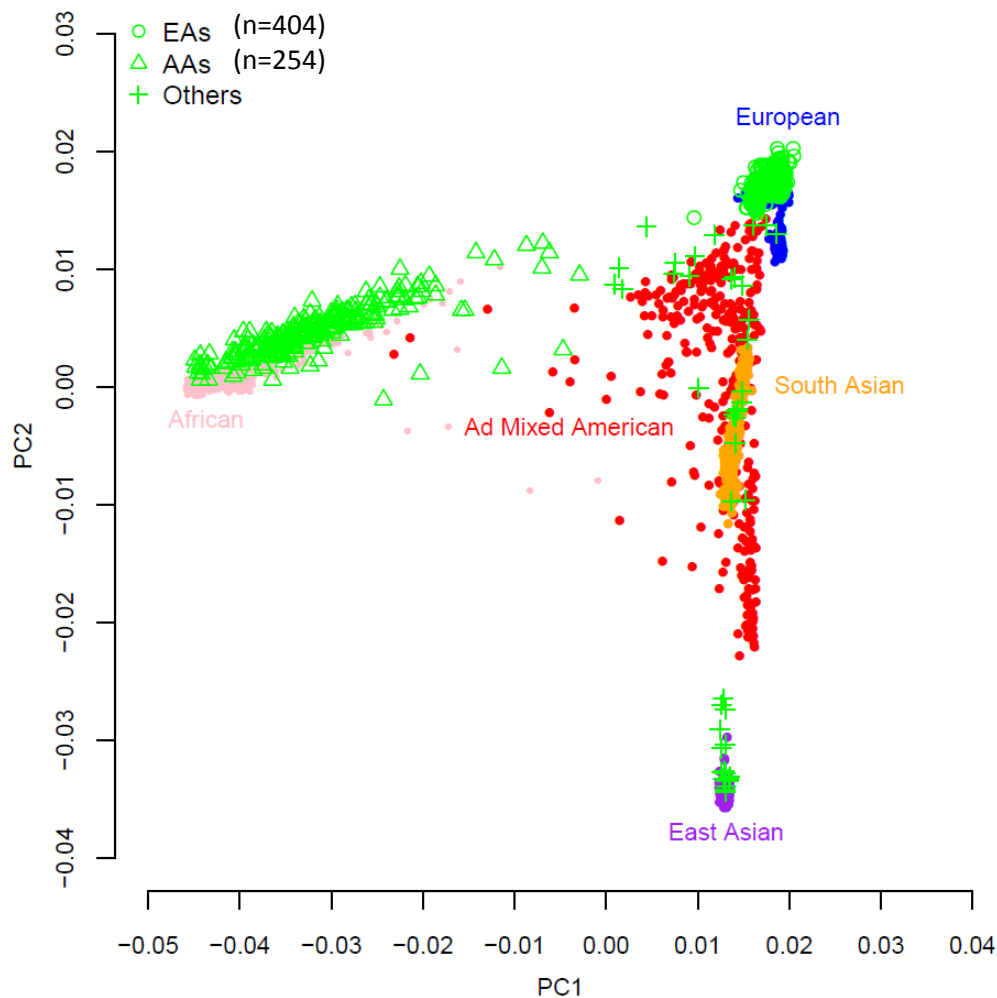

**b) Linkage disequilibrium blocks**

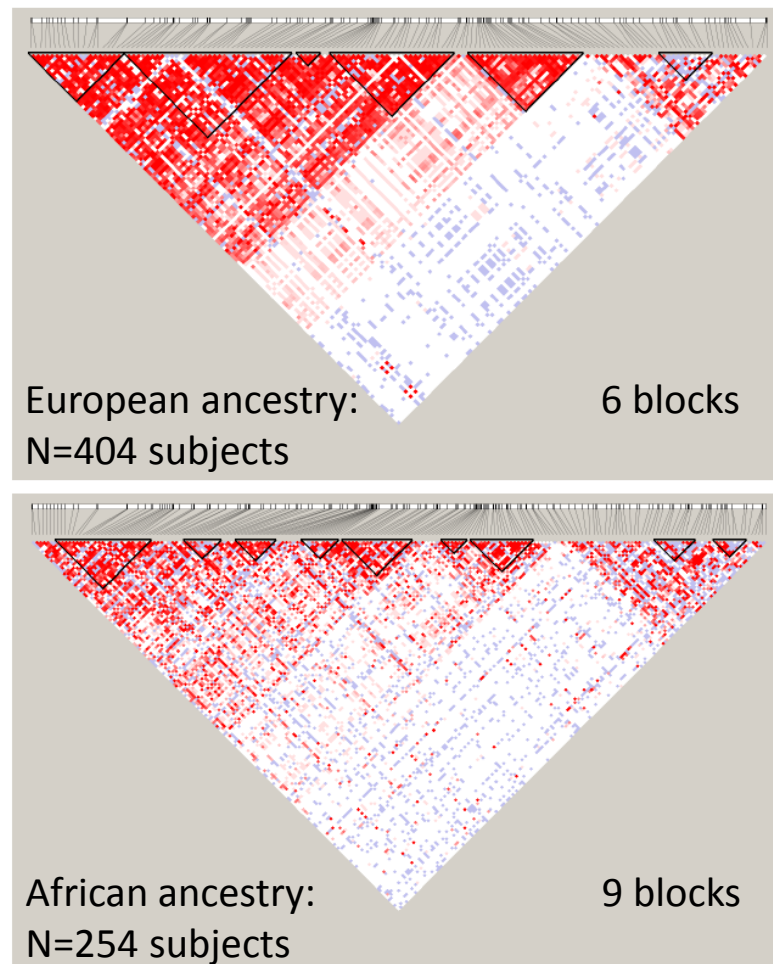

**Figure E3: MESSI study population**

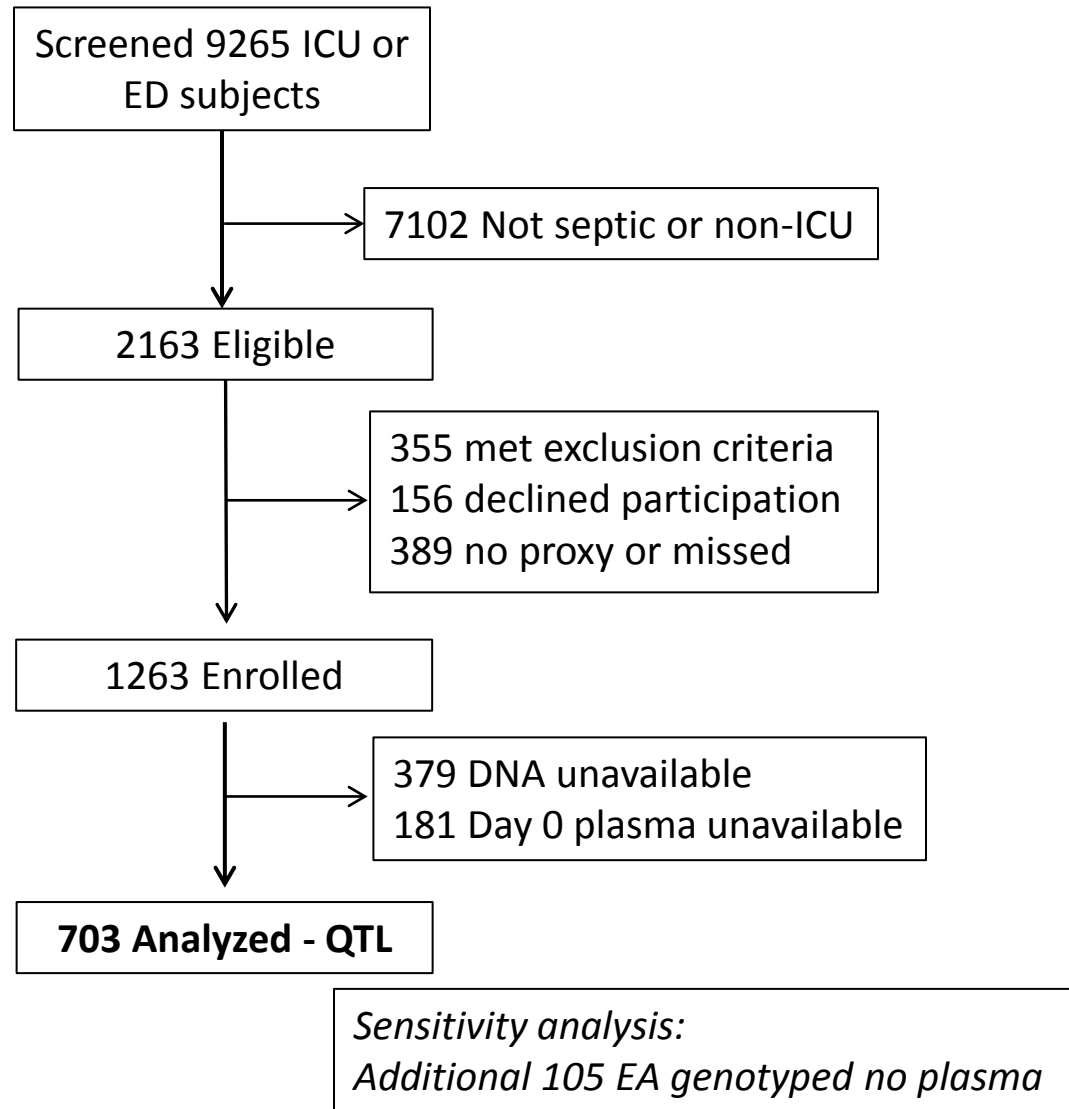

**Figure E4: Association between *ANGPT2* locus (Chromosome 8p23.1) and plasma ANG2 varies between European and African ancestry subjects. The *ANGPT2* locus is shown the green arrows.**

**A. ANG2 QTL Analysis**

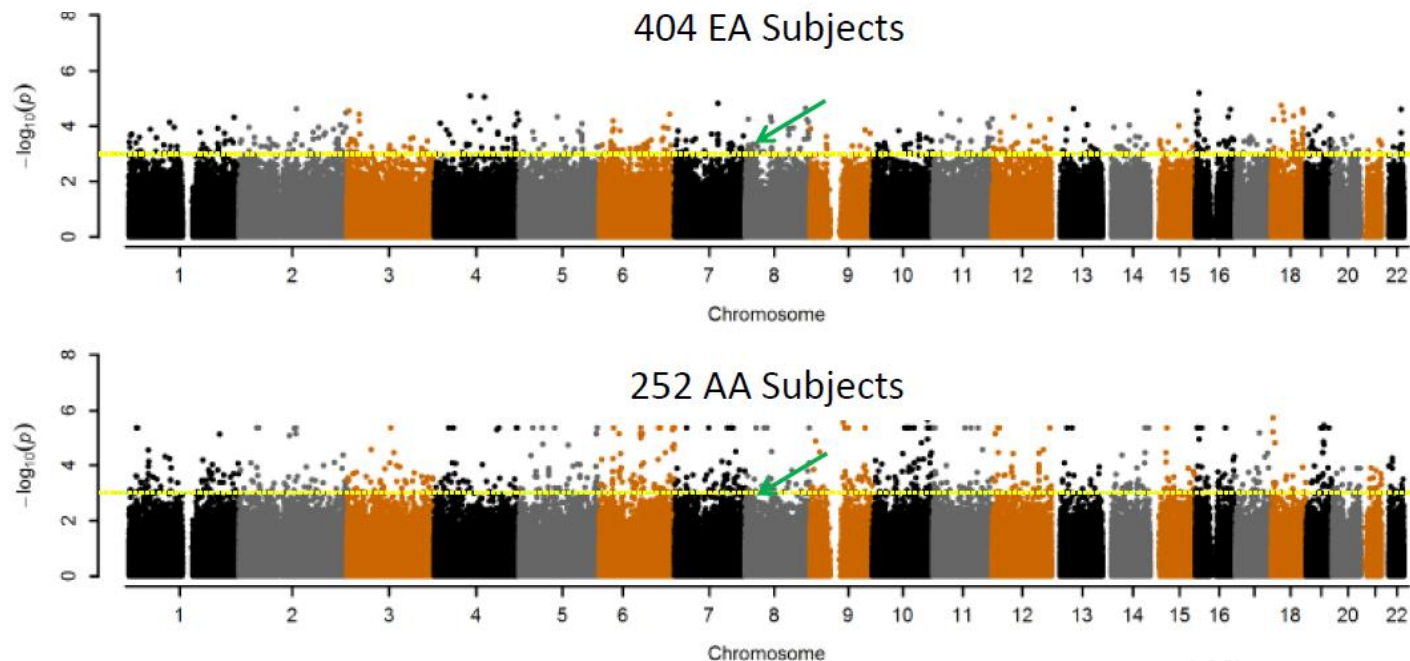

**B. Genomic inflation factor ( $\lambda$ ) in EA: 1.021**

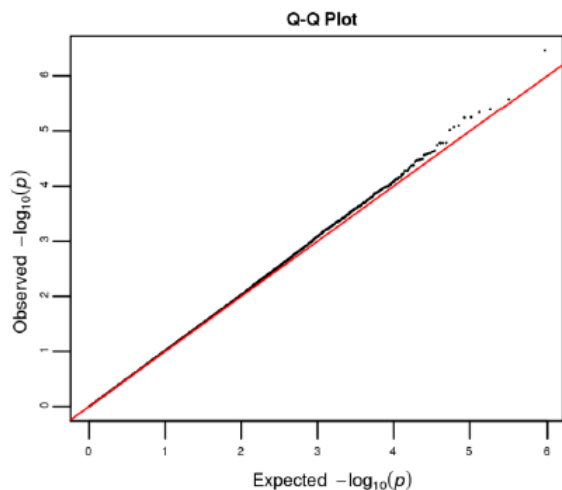

**C. Genomic inflation factor ( $\lambda$ ) in AA: 1.020**

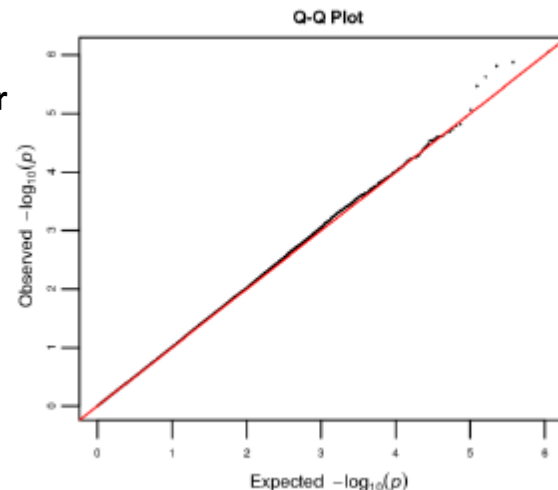

E5a

rs2442608  
p = 0.006

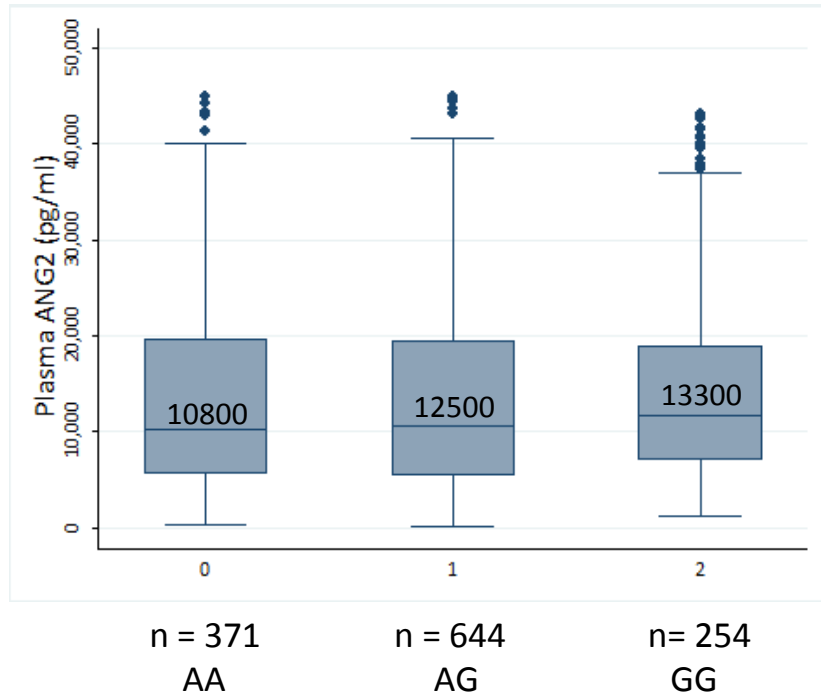

E5b

rs2515466  
p < 0.001

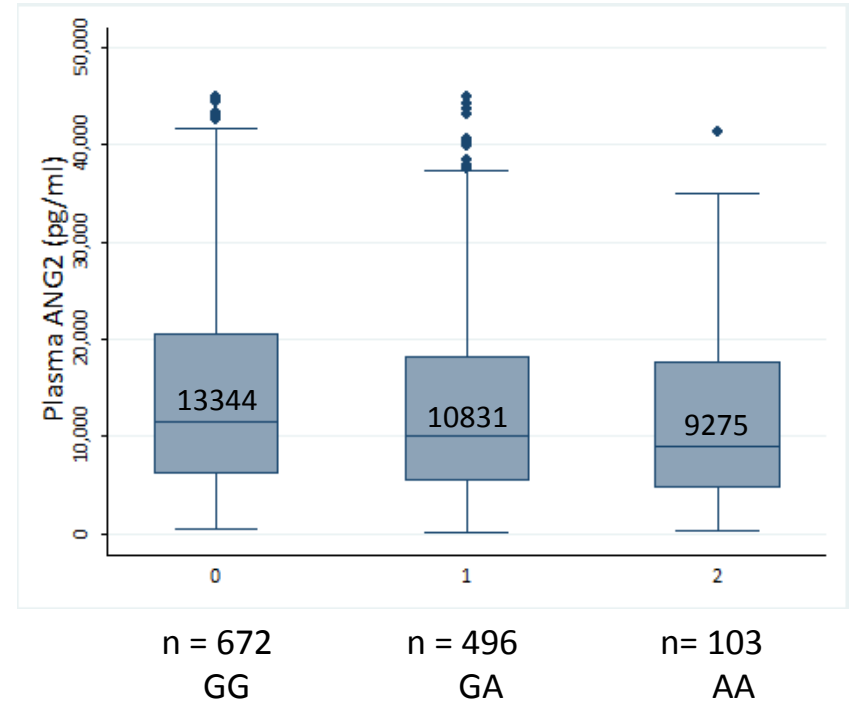

**Figure E5: Plasma ANG2 concentration associations with 2 *ANGPT2* SNPs, rs2442608 (a) and rs2515466 (b).** Median, interquartile range, and 95% confidence intervals are shown for all subjects included in the meta-analysis. Linear regression was used to test the association of each SNP with plasma ANG2 assuming an additive model.
